# Supplementary material for: TSCC: Two-Stage Combinatorial Clustering for virtual screening using protein-ligand interactions and physicochemical features
Source: PubMed Central journal article supplement (PMC3005922; doi:10.1186/1471-2164-11-s4-s26), 2010-12-02
Supplement: 1471-2164-11-S4-S26-S1.pdf [file 1471-2164-11-S4-S26-S1.pdf]

## GEMDOCK scoring function

The energy function can be dissected into the following terms:

$$E_{tot} = E_{bind} + E_{pharma} + E_{ligpre} \quad (1)$$

where  $E_{bind}$  is the empirical binding energy,  $E_{pharma}$  is the energy of binding site pharmacophores (hot spots), and  $E_{ligpre}$  is a penalty value if a ligand does not satisfy the ligand preferences.  $E_{pharma}$  and  $E_{ligpre}$  (see Mining pharmacological consensus subsection) help select active compounds by improving the number of true positives. The values of  $E_{pharma}$  and  $E_{ligpre}$  are set to zero if active compounds are not available. Thus, the empirical-binding energy ( $E_{bind}$ ) is given as:

$$E_{bind} = E_{inter} + E_{intra} + E_{penal} \quad (2)$$

where  $E_{inter}$  and  $E_{intra}$  are the intermolecular and intramolecular energies, respectively, and  $E_{penal}$  is a large penalty value if the ligand is out of the range of the search box. For this study,  $E_{penal}$  was set to 10,000. The intermolecular energy is defined as:

$$E_{inter} = \sum_{i=1}^{lig} \sum_{j=1}^{pro} \left[ F(r_{ij}^{B_{ij}}) + 332.0 \frac{q_i q_j}{4r_{ij}^2} \right] \quad (3)$$

where  $r_{ij}$  is the distance between the atoms  $i$  and  $j$ ;  $q_i$  and  $q_j$  are the formal charges and 332.0 is a factor that converts the electrostatic energy into kilocalories per mole. The *lig* and *pro* denote the numbers of the heavy atoms in the ligand and receptor, respectively.  $F(r_{ij}^{B_{ij}})$  is a simple atomic pair-wise potential function as defined in our

previous study [5] where  $r_{ij}^{B_{ij}}$  is the distance between atoms  $i$  and  $j$  with interaction type  $B_{ij}$  formed by pair-wise heavy atoms between ligands and proteins,  $B_{ij}$  is either a hydrogen bond or a steric state. We used the atom formal charge to calculate the electrostatic energy [3], which is set to 5 or  $-5$ , respectively. The intramolecular energy of a ligand is:

$$E_{intra} = \sum_{i=1}^{lig} \sum_{j=i+2}^{lig} \left[ F(r_{ij}^{B_{ij}}) + 332.0 \frac{q_i q_j}{4r_{ij}^2} \right] + \sum_{k=1}^{dihed} A[1 - \cos(m\theta_k - \theta_0)] \quad (4)$$

where  $F(r_{ij}^{B_{ij}})$  is defined as in Equation 3 except the value is set to 1000 when  $r_{ij}^{B_{ij}}$

$< 2.0 \text{ \AA}$ , and *dihed* is the number of rotatable bonds in a ligand. We followed the work of Gehlhaar et al. [ ] to set the values of  $A$ ,  $m$ , and  $\theta_0$ . For the  $sp^3$ - $sp^3$  bond,  $A = 3.0$ ,  $m = 3$ , and  $\theta_0 = \pi$ ; for the  $sp^3$ - $sp^2$  bond,  $A = 1.5$ ,  $m = 6$ , and  $\theta_0 = 0$ .

When known active ligands were available, GEMDOCK used a pharmacophore-based scoring function (Equation 1). If known active compounds were not available  $LP_{elec}$  and  $LP_{hb}$  were set to zero and GEMDOCK used a purely empirical-based scoring function (Equation 2). After all of the protein-ligand interactions were calculated, the atom interaction-profile weight of the target protein representing the pharmacological consensus of a particular interaction was given as:

$$Q_j^k = \frac{f_j^k}{N} \quad (5)$$

where  $N$  is the number of known active compounds and  $f_j^k$  is the total interaction number of an atom  $j$  (in a protein) interacting with an atom of known active ligands with the interaction type  $k$  (e.g., hydrogen bonding or hydrogen-charged interactions). An atom  $j$  in the reference protein was considered a hot-spot atom when  $Q_j^k$  was more than 0.5.
