# Supplementary material for: TSCC: Two-Stage Combinatorial Clustering for virtual screening using protein-ligand interactions and physicochemical features
Source: PubMed Central journal article supplement (PMC3005922; doi:10.1186/1471-2164-11-s4-s26), 2010-12-02
Supplement: 1471-2164-11-S4-S26-S2.pdf [file 1471-2164-11-S4-S26-S2.pdf]

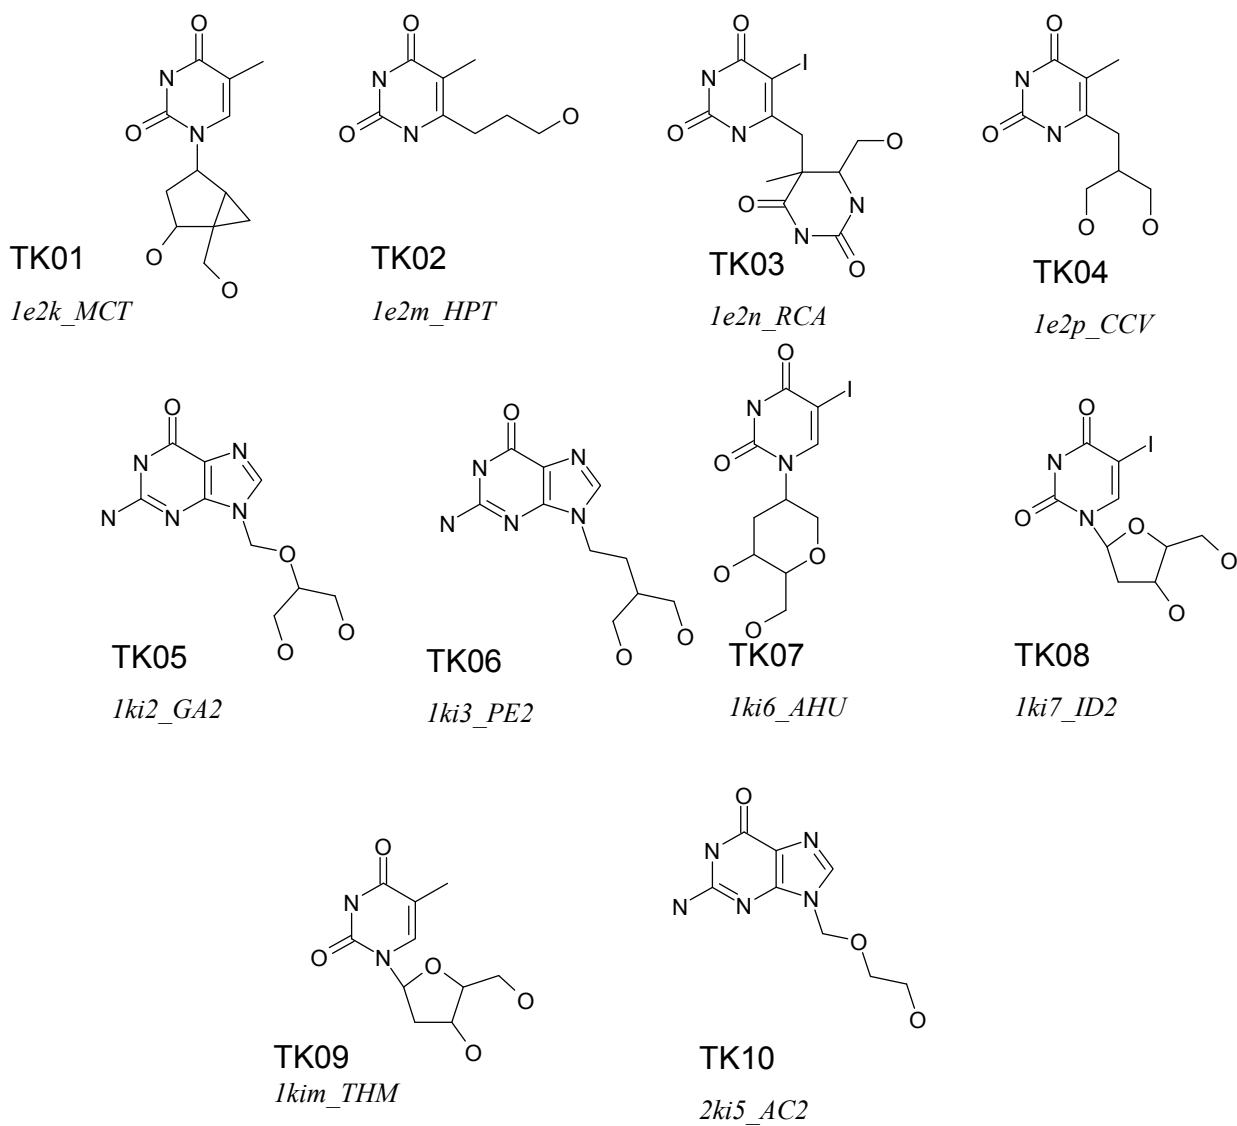

**Figure S1.** Ten TK (thymidine kinase) active compound structures.
